# Supplementary material for: Controlled synthesis of up-conversion luminescent Gd/Tm-MOFs for pH-responsive drug delivery and UCL/MRI dual-modal imaging
Source: Royal Society of Chemistry journal article supplement (doi:10.1039/c8dt02436g), 2018-01-01
Supplement: c8dt02436g1.pdf [file c8dt02436g1.pdf]

## Supporting Information for

### Controllable Synthesis of Up-Conversion Luminescent Gd/Tm-MOFs promising for pH-Responsive Delivery and Dual-Modal Imaging

#### Table of Contents:

| Supporting Figures                                                                                                                             |
|------------------------------------------------------------------------------------------------------------------------------------------------|
| <b>Figure S1.</b> Pie chart of Reports on MOFs with up-conversion luminescence.                                                                |
| <b>Figure S2.</b> Pie chart of reports on multifunctional materials integrating with UCL/MRI.                                                  |
| <b>Figure S3.</b> Pie chart of reports on application of Gd-MOFs and Tm-MOFs.                                                                  |
| <b>Figure S4.</b> The decay curves for the $^1D_2 \rightarrow ^3F_4$ emissions of $Tm^{3+}$ in Gd/Tm-MOFs.                                     |
| <b>Figure S5.</b> The dynamic light scattering of Gd/Tm-MOFs, Gd/Tm-MOFs@mSiO <sub>2</sub> -FA, respectively.                                  |
| <b>Figure S6.</b> The EDS of Gd/Tm-MOFs@mSiO <sub>2</sub> -FA.                                                                                 |
| <b>Figure S7.</b> N <sub>2</sub> adsorption and desorption isotherm, and pore-size distributions of Gd/Tm-MOFs, Gd/Tm-MOFs@mSiO <sub>2</sub> . |
| <b>Figure S8.</b> Pie chart of distribution DOX release percent.                                                                               |
| <b>Figure S9.</b> Pie chart of reports on Gd <sup>3+</sup> as T <sub>1</sub> -MRI contrast agents.                                             |
| Supporting Tables                                                                                                                              |
| <b>Table S1.</b> Reports on Gd/Tm-MOFs with up-conversion luminescence.                                                                        |
| <b>Table S2.</b> Homogenous materials integrating with UCL/MRI.                                                                                |
| <b>Table S3.</b> Applications of Gd-MOFs and Tm-MOFs.                                                                                          |
| <b>Table S4.</b> Selected bond lengths [ $\text{\AA}$ ] and angles [ $^\circ$ ] for RE(BTC)•(H <sub>2</sub> O)•DMF.                            |
| <b>Table S5.</b> List of composites based on the mesoporous silica for DOX delivery.                                                           |
| <b>Table S6.</b> Examples of Gd <sup>3+</sup> as excellent T <sub>1</sub> -MRI contrast agents.                                                |

**Table S1.** Reports on MOFs with UCL.

| Metal ions                                                                               | Ligand                                                                              | Excitation wavelength (nm) | Lifetime ( $\mu$ s) | Quantum Yield | Application                              | Ref              |
|------------------------------------------------------------------------------------------|-------------------------------------------------------------------------------------|----------------------------|---------------------|---------------|------------------------------------------|------------------|
| Tb <sup>3+</sup>                                                                         | N-[2-(bis{2-[(2-methoxybenzoyl)amino]ethyl}amino)ethyl]-2-methoxybenzamide          | 845                        | —                   | —             | —                                        | 1                |
| Y <sup>3+</sup> , Yb <sup>3+</sup> , Er <sup>3+</sup>                                    | 1,4-benzenedicarboxylate                                                            | 980                        | —                   | —             | —                                        | 2                |
| Y <sup>3+</sup> , Er <sup>3+</sup>                                                       | 1,3,5-benzenetricarboxylic acid                                                     | 980                        | 113.89              | —             | Ibuprofen delivery                       | 3                |
| Y <sup>3+</sup> , Yb <sup>3+</sup> , Er <sup>3+</sup>                                    | Oxalate anion and 4,4'-oxybis(benzoic acid)                                         | 980                        | —                   | —             | —                                        | 4                |
| Y <sup>3+</sup> , Yb <sup>3+</sup> , Er <sup>3+</sup>                                    | 2,3-pyrazinedicarboxylic acid                                                       | 975                        | —                   | —             | —                                        | 5                |
| Y <sup>3+</sup> , Yb <sup>3+</sup> , Er <sup>3+</sup>                                    | pyrazine-2,3-carboxylic acid                                                        | 974                        | —                   | —             | —                                        | 6                |
| Nd <sup>3+</sup> /Gd <sup>3+</sup> /Pr <sup>3+</sup> /Ce <sup>3+</sup> /Sm <sup>3+</sup> | anthracene dicarboxylate & dimethylacetamide                                        | 800                        | —                   | —             | —                                        | 7                |
| Er <sup>3+</sup> /Ho <sup>3+</sup> , Na <sup>+</sup>                                     | pyrazine-2,3,5-tricarboxylate                                                       | 980                        | —                   | —             | —                                        | 8                |
| Er <sup>3+</sup>                                                                         | 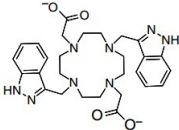 | 980                        | —                   | —             | —                                        | 9                |
| Gd <sup>3+</sup> , Tm <sup>3+</sup>                                                      | 1,3,5-benzenetricarboxylic acid                                                     | 980                        | $\tau=379\pm 2$     | 0.76 %        | Drug delivery, UCL/MRI dual-mode imaging | <b>This work</b> |

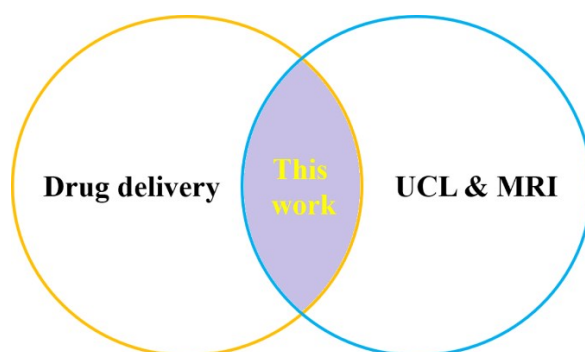

**Figure S1.** Pie chart of reports on MOFs with up-conversion luminescence.

## References:

1. Wong, K. L.; Kwok, W. M.; Wong, W. T.; Phillips, D. L.; Cheah, K. W. Green and Red Three-Photon Upconversion from Polymeric Lanthanide(III) Complexes. *Angew. Chem.* **2004**, *116*, 4759–4762.
2. Weng, D. F.; Zheng, X. J.; Jin, L. P. Assembly and Upconversion Properties of Lanthanide Coordination Polymers Based on Hexanuclear Building Blocks with ( $\mu_3$ -OH) Bridges. *Eur. J. Inorg. Chem.* **2006**, 4184–4190.
3. Zhang, X. D.; Li, B.; Ma, H. P.; Zhang, L. M.; Zhao, H. F. Metal–Organic Frameworks Modulated by Doping  $\text{Er}^{3+}$  for Up-Conversion Luminescence. *ACS Appl. Mat. Interfaces.* **2017**, *9*, 2594–2605.
4. Sun, C. Y.; Zheng, X. J.; Chen, X. B.; Li, L. C.; Jin, L. P. Assembly and Upconversion Luminescence of Lanthanide–Organic Frameworks with Mixed Acid Ligands. *Inorg. Chim. Acta* **2009**, *362*, 325–330.
5. Weng, D.F.; Zheng, X.J.; Chen, X.B.; Li, L.C.; Jin, L.P. Synthesis, Upconversion Luminescence and Magnetic Properties of New Lanthanide–Organic Frameworks with  $(4^3)_2(4^6, 6^6, 8^3)$  Topology. *Eur. J. Inorg. Chem.* **2007**, *21*, 3410–3415.
6. Giedraityte, Z. Tuomisto, M. Lastusaari, M. Karppinen, M. Three- and Two-Photon NIR-to-Vis (Yb,Er) Upconversion from ALD/MLD-Fabricated Molecular Hybrid Thin Films. *ACS Appl. Mater. Interfaces* **2018**, *10* (10), 8845–8852.
7. Quah, H. S.; Ng, L. T.; Donnadiou, B.; Tan, G. K.; Vittal, J. J. Molecular Scissoring: Facile 3D to 2D Conversion of Lanthanide Metal Organic Frameworks Via Solvent Exfoliation. *Inorg. Chem.* **2016**, *55*, 10851–10854.
8. Zheng, X. J.; Ablet, A.; Ng, C.; Wong, W. T. Intensive Upconversion Luminescence of Na-Codoped Rare-Earth Oxides with a Novel RE–Na Heterometallic Complex as Precursor. *Inorg. Chem.* **2014**, *53*, 6788–6793.
9. Nonat, A.; Chan, C. F.; Liu, T.; Platas-Iglesias, C.; Liu, Z.; Wong, W. T.; Wong, W. K.; Wong, K. L.; Charbonnière, L. J. Room Temperature Molecular Up Conversion in Solution. *Nat. Commun.* **2016**, *7*, 11978.

**Table S2.** Homogenous materials integrating with UCL/MRI.

| Structure of materials                                                                                   | Application                | Ref              |
|----------------------------------------------------------------------------------------------------------|----------------------------|------------------|
| $\text{Gd}_2\text{O}_3:\text{Yb}^{3+}/\text{Ln}^{3+}$ UCNs                                               | UCL, MRI                   | 1–3              |
| $\text{Gd}_2\text{O}_3:\text{Yb}^{3+}/\text{Er}^{3+}$                                                    | UCL, MRI, CT               | 4                |
| $\text{Gd}_2\text{O}_3$ hollow spheres                                                                   | Drug delivery,<br>UCL, MRI | 5                |
| $\text{GdPO}_4:\text{Yb,Er}$                                                                             | UCL, MRI                   | 6                |
| $\text{NaY}_{0.2}\text{Gd}_{0.6}\text{Yb}_{0.18}\text{Er}_{0.02}\text{F}_4$                              | UCL, MRI, PET              | 7                |
| $\text{BaGdF}_5:\text{Yb/Er}$                                                                            | UCL, MRI, CT               | 8                |
| $\text{NaGdF}_4:\text{Yb}^{3+}, \text{Ln}^{3+}$                                                          | UCL, MRI                   | 9–13             |
| $\text{NaLuF}_4:\text{Yb}^{3+}, \text{Tm}^{3+}, \text{Gd}^{3+}$                                          | UCL, MRI                   | 14               |
| $\text{Gd}^{3+}\text{-Zn}_{2.94}\text{Ga}_{1.96}\text{Ge}_2\text{O}_{10}:\text{Cr}^{3+}, \text{Pr}^{3+}$ | UCL, MRI                   | 15               |
| $\text{Dy}_2\text{O}_3:\text{Tb}^{3+}$                                                                   | UCL, MRI                   | 16               |
| $\text{Gd}_2\text{Mo}_3\text{O}_9:\text{Er}^{3+}/\text{Yb}^{3+}$                                         | UCL, MRI                   | 17               |
| $\text{NaYbF}_4:\text{Tm}^{3+}/\text{Gd}^{3+}$                                                           | UCL, MRI                   | 18               |
| $\text{BaYbF}_5:\text{Gd/Er}$                                                                            | UCL, MRI, CT               | 19               |
| $\text{Ba}_2\text{GdF}_7:\text{Yb}^{3+}, \text{Er}^{3+}$                                                 | UCL, MRI                   | 20               |
| $\text{NaYF}_4:\text{Yb}^{3+}, \text{Er}^{3+}/\text{Gd}^{3+}$                                            | UCL, MRI, CT               | 21               |
| $\beta\text{-Ca}_3(\text{PO}_4)_2:\text{Gd}^{3+}, \text{Dy}^{3+}, \text{Yb}^{3+}$                        | UCL, MRI, CT               | 22               |
| $\text{Mn}^{2+}$ doped $\text{NaLuF}_4:\text{Yb/Er}$                                                     | UCL, MRI, CT               | 23               |
| $(\text{Gd}^{3+}, \text{Tm}^{3+})(\text{BTC})\cdot(\text{H}_2\text{O})\cdot\text{DMF}$                   | Drug delivery,<br>UCL, MRI | <b>This work</b> |

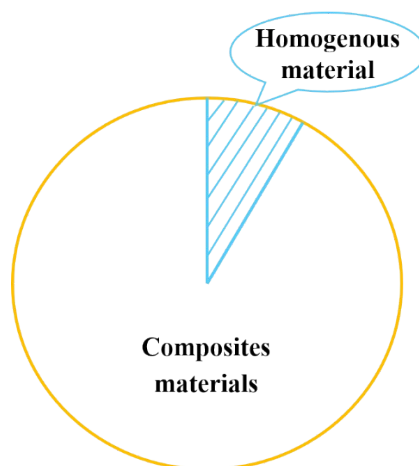

**Figure S2.** Pie chart of reports on multifunctional materials integrating with UCL/MRI.

**References:**

1. Liu, J.; Huang, L.; Tian, X. M.; Chen, X. M.; Shao, Y. G.; Xie, F. K.; Chen, D. H.; Li, L. Magnetic and Fluorescent  $\text{Gd}_2\text{O}_3:\text{Yb}^{3+}/\text{Ln}^{3+}$  Nanoparticles for Simultaneous Upconversion Luminescence/MR Dual Modal Imaging and NIR-Induced Photodynamic Therapy. *Int. J. Nanomed.* **2017**, *12*, 1–14.
2. Zhou, L. J.; Gu, Z. J.; Liu, X. X.; Yin, W. Y.; Tian, G.; Yan, L.; Jin, S.; Ren, W. L.; G. Xing, M.; Li, W.; Chang, X. L.; Hu, Z. B.; Zhao, Y. L. Size-Tunable Synthesis of Lanthanide-Doped  $\text{Gd}_2\text{O}_3$  Nanoparticles and Their Applications for Optical and Magnetic Resonance Imaging. *J. Mater. Chem.* **2012**, *22*, 966–974.
3. Das, G. K.; Heng, B. C.; Ng, S. C.; White, T.; Loo, J. S. C.; D'Silva, L.; Padmanabhan, P.; Bhakoo, K. K.; Selvan, S. T.; Tan, T. T. Y. Gadolinium Oxide Ultranarrow Nanorods as Multimodal Contrast Agents for Optical and Magnetic Resonance Imaging. *Langmuir.* **2010**, *26*, 8959–8965.
4. Liu, Z.; Pu, F.; Huang, S.; Yuan, Q.; Ren, J.; Qu, X. Long-Circulating  $\text{Gd}_2\text{O}_3:\text{Yb}^{3+}$ ,  $\text{Er}^{3+}$  Up-Conversion Nanoprobes as High-Performance Contrast Agents for Multi-Modality Imaging. *Biomaterials* **2013**, *34*, 1712–1721.
5. Tian, G.; Gu, Z. J.; Liu, X. X.; Zhou, L. J.; Yin, W. Y.; Yan, L.; Jin, S.; Ren, W. L.; Xing, G. M.; Li, S. J.; Zhao, Y. L. Facile Fabrication of Rare-Earth-Doped  $\text{Gd}_2\text{O}_3$  Hollow Spheres with Upconversion Luminescence, Magnetic Resonance, and Drug Delivery Properties. *J. Phys. Chem. C* **2011**, *115*, 23790–23796.
6. Ren, W. L.; Tian, G.; Zhou, L. J.; Yin, W. Y.; Yan, L.; Jin, S.; Zu, Y.; Li, S. J.; Gu, Z. J.; Zhao, Y. L. Lanthanide Ion-Doped  $\text{GdPO}_4$  Nanorods with Dual-Modal Bio-Optical and Magnetic Resonance Imaging Properties. *Nanoscale* **2012**, *4*, 3754–3760.
7. Zhou, J.; Yu, M. X.; Sun, Y.; Zhang, X. Z.; Zhu, X. J.; Wu, Z. H.; Wu, D. M.; Li, F. Y. Fluorine-18-Labeled  $\text{Gd}^{3+}/\text{Yb}^{3+}/\text{Er}^{3+}$  Co-Doped  $\text{NaYF}_4$  Nanophosphors for Multimodality

- PET/MR/UCL Imaging. *Biomaterials* **2011**, *32*, 1148–1156.
8. Zeng, S.; Tsang, M. K.; Chan, C. F.; Wong, K. L.; Hao, J. PEG Modified BaGdF<sub>5</sub>:Yb/Er Nanoprobes for Multi-Modal Upconversion Fluorescent, in *Vivo* X-Ray Computed Tomography and Biomagnetic Imaging. *Biomaterials* **2012**, *33*, 9232–9238.
  9. Zhou, J.; Sun, Y.; Du, X.; Xiong, L.; Hu, H.; Li, F. Y. Dual-Modality in *Vivo* Imaging Using Rare-Earth Nanocrystals with Near-Infrared to Near-Infrared (NIR-to-NIR) Upconversion Luminescence and Magnetic Resonance Properties. *Biomaterials* **2010**, *31*, 3287–3295.
  10. Ryu, J.; Park, H. Y.; Kim, K.; Kim, H.; Yoo, J. H.; Kang, M.; Im, K.; Grailhe, R.; Song, R. Facile Synthesis of Ultrasmall and Hexagonal NaGdF<sub>4</sub>: Yb<sup>3+</sup>, Er<sup>3+</sup> Nanoparticles with Magnetic and Upconversion Imaging Properties. *J. Phys. Chem. C* **2010**, *114*, 21077–21082.
  11. Lee, J.; Lee, T. S.; Ryu, J.; Hong, S.; Kang, M.; Im, K.; Kang, J. H.; Lim, S. M.; Park, S.; Song, R. RGD Peptide-Conjugated Multimodal NaGdF<sub>4</sub>:Yb<sup>3+</sup>/Er<sup>3+</sup> Nanophosphors for Upconversion Luminescence, MR, and PET Imaging of Tumor Angiogenesis. *J. Nucl. Med.* **2013**, *54*, 96–103.
  12. Liu, C. Y.; Gao, Z. Y.; Zeng, J. F.; Hou, Y.; Fang, F.; Li, Y. L.; Qiao, R. R.; Shen, L.; Lei, H.; Yang, W. S.; Gao, M. Y. Magnetic/Upconversion Fluorescent NaGdF<sub>4</sub>:Yb,Er Nanoparticle-Based Dual-Modal Molecular Probes for Imaging Tiny Tumors *in Vivo*. *ACS nano* **2013**, *7*, 7227–7240.
  13. Chen, H. Y.; Qi, B.; Moore, T.; Colvin, D. C.; Crawford, T.; Gore, J. C.; Alexis, F.; Mefford, O. T.; Anker, J. N. Synthesis of Brightly PEGylated Luminescent Magnetic Upconversion Nanophosphors for Deep Tissue and Dual MRI Imaging. *Small* **2014**, *10*, 160–168.
  14. Zeng, S. J.; Xiao, J. J.; Yang, Q. B.; Hao, J. H. Bi-Functional NaLuF<sub>4</sub>:Gd<sup>3+</sup>/Yb<sup>3+</sup>/Tm<sup>3+</sup> Nanocrystals: Structure Controlled Synthesis, Near-Infrared Upconversion Emission and Tunable Magnetic Properties. *J. Mater. Chem.* **2012**, *22*, 9870–9874.
  15. Zhou, J.; Zhu, X.; Chen, M.; Sun, Y.; Li, F. Y. Water-Stable NaLuF<sub>4</sub>-Based Upconversion Nanophosphors with Long-Term Validity for Multimodal Lymphatic Imaging. *Biomaterials* **2012**, *33*, 6201–6210.
  16. Wang, H. B.; Lu, W.; Zeng, T. M.; Yi, Z. G.; Rao, L.; Liu, H. R.; Zeng, S. J. Multi-Functional NaErF<sub>4</sub>:Yb Nanorods: Enhanced Red Upconversion Emission, *in Vitro* Cell, *in Vivo* X-Ray, and T<sub>2</sub>-Weighted Magnetic Resonance Imaging. *Nanoscale*, **2014**, *6*, 2855–2860.
  17. Das, G. K.; Zhang, Y.; D’Silva, L.; Padmanabhan, P.; Heng, B. C.; Loo, J. S. C.; Selvan, S. T.; Bhakoo, K. K.; Tan, T. T. Y. Single-Phase Dy<sub>2</sub>O<sub>3</sub>:Tb<sup>3+</sup> Nanocrystals as Dual-Modal Contrast Agent for High Field Magnetic Resonance and Optical Imaging. *Chem. Mater.* **2011**, *23*, 2439–2446.
  18. Xue, Z.; Yi, Z.; Li, X.; Li, Y.; Jiang, M.; Liu, H. Upconversion Optical/Magnetic Resonance Imaging-Guided Small Tumor Detection and *in Vivo* Tri-Modal Bioimaging based on High-Performance Luminescent Nanorods. *Biomaterials* **2017**, *115*, 90–103.

19. Li, X.; Yi, Z.; Xue, Z.; Zeng, S.; Liu, H. Multifunctional BaYbF<sub>5</sub>: Gd/Er Upconversion Nanoparticles for *in Vivo* Tri-Modal Upconversion Optical, X-Ray Computed Tomography and Magnetic Resonance Imaging. *Mater. Sci. Eng. C* **2017**, *75*, 510–516.
20. Feng, Y.; Chen, H.; Ma, L.; Shao, B.; Zhao, S.; Wang, Z. Surfactant-Free Aqueous Synthesis of Novel Ba<sub>2</sub>GdF<sub>7</sub>:Yb<sup>3+</sup>, Er<sup>3+</sup>@PEG Upconversion Nanoparticles for *in Vivo* Trimodality Imaging. *ACS Appl. Mater. Interfaces* **2017**, *9*, 1–17.
21. Liu, Q.; Sun, Y.; Li, C. G.; Zhou, J.; Li, C. Y.; Yang, T. S.; Zhang, X. Z.; Yi, T.; Wu, D. M.; Li, F. Y. <sup>18</sup>F-Labeled Magnetic-Upconversion Nanophosphors via Rare-Earth Cation-Assisted Ligand Assembly. *ACS Nano* **2011**, *5*, 3146–3157.
22. Meenambal, R.; Kannan, S. Cosubstitution of Lanthanides (Gd<sup>3+</sup>/Dy<sup>3+</sup>/Yb<sup>3+</sup>) in β-Ca<sub>3</sub>(PO<sub>4</sub>)<sub>2</sub> for Upconversion Luminescence, CT/MRI Multimodal Imaging. *ACS Biomater. Sci. Eng.* **2017**, 47–56.
23. Deng, H. L.; Huang, S.; Xu, C. Intensely Red-Emitting Luminescent Upconversion Nanoparticles for Deep-Tissue Multimodal Bioimaging. *Talanta*, **2018**, 1–22.

**Table S3.** Applications of Gd-MOFs and Tm-MOFs.

| <b>Metal ions</b>      | <b>Ligand</b>                                                                                | <b>Structure</b>                                                                                             | <b>Application</b>     | <b>Ref</b> |
|------------------------|----------------------------------------------------------------------------------------------|--------------------------------------------------------------------------------------------------------------|------------------------|------------|
| <b>Gd<sup>3+</sup></b> | N-(4-carboxybenzyl)-(3,5-dicarboxyl)pyridinium bromide (H <sub>3</sub> Cm <sub>2</sub> cpBr) | {[Gd(Cm <sub>2</sub> cp)-(H <sub>2</sub> O) <sub>3</sub> ](NO <sub>3</sub> )·3H <sub>2</sub> O} <sub>n</sub> | In vivo MRI            | 1          |
|                        | 1,4-benzenedicarboxylate and 1,2,4-benzenetricarboxylate methyl ammonium salts               | Gd MOF                                                                                                       | MRI                    | 2          |
|                        | <b>PT1</b>                                                                                   | [Gd <sub>6</sub> (PT1) <sub>4</sub> (NO <sub>3</sub> ) <sub>6</sub> ·9H <sub>2</sub> O] <sup>3+</sup>        | MRI glucosamine        | 3          |
|                        | 1,4-bis(5-carboxy-1H-benzimidazole-2-yl)benzene (pDBI)                                       | Gd-pDBI                                                                                                      | Bimodal MRI            | 4          |
|                        | 1,4-BDC                                                                                      | Gd•(1,4-BDC)                                                                                                 | Targeting and MRI      | 5          |
|                        | terephthalic acid                                                                            | Gd-MOF                                                                                                       | Bimodal MRI            | 6          |
|                        | Benzenehexacarboxylate moiety (bhc)                                                          | [Gd <sub>2</sub> (bhc)(H <sub>2</sub> O) <sub>8</sub> ](H <sub>2</sub> O) <sub>2</sub>                       | Multimodal imaging     | 7          |
| <b>Tm<sup>3+</sup></b> | 5-(4-carboxy-2-nitrophenoxy)-isophthalic acid (H <sub>3</sub> L)                             | [TmL(DMF) <sub>2</sub> ]•0.25H <sub>2</sub> O                                                                | —                      | 8          |
|                        | 1,3,5-tris(4-carboxyphenyl)-2,4,6-trimethylbenzene (H <sub>3</sub> L)                        | [Tm <sub>2</sub> (L) <sub>2</sub> (H <sub>2</sub> O) <sub>3</sub> ]•2H <sub>2</sub> O                        | Sensing and adsorption | 9          |
|                        | 1,3,5-benzenetricarboxylic acid                                                              | Tm(BTC)(DMF) <sub>2</sub> •H <sub>2</sub> O                                                                  | —                      | 10         |
|                        | 1,4-benzenedicarboxylic acid (H <sub>2</sub> BDC)                                            | Tm <sub>2</sub> (TBDC) <sub>3</sub> (DMF) <sub>2</sub> (H <sub>2</sub> O) <sub>2</sub> •4H <sub>2</sub> O    | Adsorption             | 11         |



|                                             |                                                                          |                                                                                        |                                  |                      |
|---------------------------------------------|--------------------------------------------------------------------------|----------------------------------------------------------------------------------------|----------------------------------|----------------------|
|                                             | 1,10-phenanthroline,<br>2,2'-bipyridine,<br>or triphenyl phosphate oxide | $\text{Ln}(\text{tta})_3\text{L}$                                                      | —                                | 12                   |
|                                             | succinic acid<br>( $\text{H}_2\text{L}$ )                                | $[\text{Tm}_2(\text{L})_3(\text{H}_2\text{O})_2]\cdot\text{H}_2\text{O}$               | —                                | 13                   |
|                                             | monophenanthroline                                                       | $\text{Tm}(\text{acetylacetonato})_3$<br>monophenanthroline                            | —                                | 14                   |
|                                             | tris-(dibenzoylmethanato)-<br>mono-(bathophenanthroline)                 | $\text{Tm}(\text{DBM})_3\text{bath}$                                                   | —                                | 15                   |
| <b>Gd<sup>3+</sup>,<br/>Tm<sup>3+</sup></b> | 1,3,5-benzenetricarboxylic<br>acid                                       | $(\text{Gd}^{3+}, \text{Tm}^{3+})(\text{BTC})\cdot(\text{H}_2\text{O})\cdot\text{DMF}$ | drug delivery,<br>UCL and<br>MRI | <b>This<br/>work</b> |

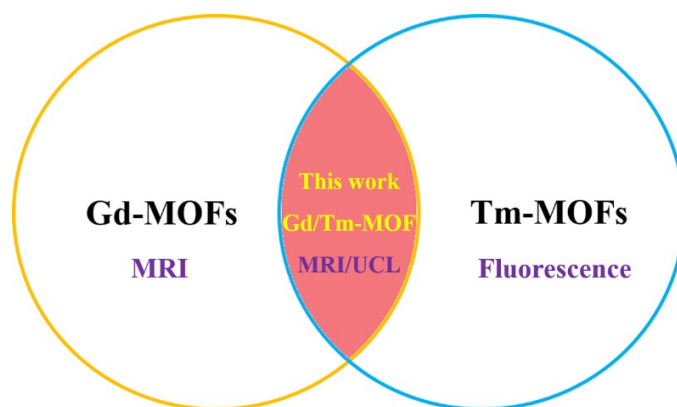

**Figure S3.** Pie chart of reports on application of Gd-MOFs and Tm-MOFs.

#### References:

1. Qin, L.; Sun, Z. Y.; Cheng, K.; Liu, S. W.; Pang, J. X.; Xia, L. M.; Chen, W. H.; Cheng, Z.; Chen, J.X. Zwitterionic Manganese and Gadolinium Metal-Organic Frameworks as Efficient Contrast Agents for *in Vivo* Magnetic Resonance Imaging. *ACS Appl. Mater. Interfaces* **2017**, *9*, 1–9.
2. Hatakeyama, W.; Sanchez, T. J.; Rowe, M. D.; Serkova, N. J.; Liberatore, M. W.; Boyes, S. G. Synthesis of Gadolinium Nanoscale Metal-Organic Framework with Hydrotropes: Manipulation of Particle Size and Magnetic Resonance Imaging Capability. *ACS Appl. Mater. Interfaces* **2011**, *3*, 1502–1510.
3. He, C.; Wu, X.; Kong, J. C.; Liu, T.; Zhang, X. L.; Duan, C. Y. A Hexanuclear Gadolinium-Organic Octahedron as a Sensitive MRI Contrast Agent for Selectively Imaging Glucosamine in Aqueous Media. *Chem. Commun.* **2012**, *48*, 9290–9292.
4. Kundu, T.; Mitra, S.; Díaz Díaz, D.; Banerjee, R. Gadolinium(III)-Based Porous Luminescent

- Metal–Organic Frameworks for Bimodal Imaging. *ChemPlusChem*, **2016**, *81*, 728–732.
- Rowe, M. D.; Thamm, D. H.; Kraft, S. L.; Boyes, S. G. Polymer-Modified Gadolinium Metal–Organic Framework Nanoparticles Used as Multifunctional Nanomedicines for the Targeted Imaging and Treatment of Cancer. *Biomacromolecules* **2009**, *10*, 983–993.
  - Tian, C. X.; Zhu, L. P.; Feng, L.; Boyes, S. G. Poly(acrylic acid) Bridged Gadolinium Metal–Organic Framework–Gold Nanoparticle Composites as Contrast Agents for Computed Tomography and Magnetic Resonance Bimodal Imaging. *ACS Appl. Mater. Interfaces* **2015**, *7*, 17765.
  - Taylor, K. M.; Jin, A.; Lin, W. Surfactant-Assisted Synthesis of Nanoscale Gadolinium Metal–Organic Frameworks for Potential Multimodal Imaging. *Angew. Chem. Int. Ed.* **2008**, *47*, 7722–7725.
  - Su, S. Q.; Wang, S.; Song, X. Z.; Song, S. Y.; Qin, C.; Zhu, M.; Hao, Z. M.; Zhao, S. N.; Zhang, H. J. Syntheses, Structures, Photoluminescence, and Magnetic Properties of (3,6)- and 4-Connected Lanthanide Metal–Organic Frameworks with a Semirigid Tricarboxylate Ligand. *Dalton Trans.* **2012**, *41*, 4772–4779.
  - Wang, X. Q.; Zhang, L. L.; Yang, J.; Liu, F. L.; Dai, F. N.; Wang, R. M.; Sun, D. F. Lanthanide Metal–Organic Frameworks Containing a Novel Flexible Ligand for Luminescence Sensing of Small Organic Molecules and Selective Adsorption. *J. Mater. Chem. A* **2015**, *3*, 12777–12785.
  - Li, Z. Y.; Zhu, G. S.; Guo, X. D.; Zhao, X. J.; Jin, Z.; Qiu, S. L. Synthesis, Structure, and Luminescent and Magnetic Properties of Novel Lanthanide Metal–Organic Frameworks with Zeolite-like Topology. *Inorg. Chem.* **2007**, *46*, 5174–5178.
  - He, H.; Yuan, D.; Ma, H.; Sun, D.; Zhang, G.; Zhou, H. C. Control over Interpenetration in Lanthanide–Organic Frameworks: Synthetic Strategy and Gas-Adsorption Properties. *Inorg. Chem.* **2010**, *49*, 7605–7607.
  - Dang, S.; Sun, L.N.; Zhang, H.J.; Guo, X.M.; Li, Z.F.; Feng, J.; Guo, H.D.; Guo, Z.Y. Near-Infrared Luminescence from Sol–Gel Materials Doped with Holmium(III) and Thulium(III) Complexes. *J. Phys. Chem. C* **2008**, *112*, 13240–13247.
  - Oliveira, C. A. F. D.; Silva, F. F. D.; Malvestiti, I.; Malta, V. R. D. S.; Dutra, J. D. L.; Jr, N. B. D. C.; Freire, R. O.; Júnior, S. A. Effect of Temperature on Formation of Two New Lanthanide Metal–Organic Frameworks: Synthesis, Characterization and Theoretical Studies of Tm(III)-Succinate. *J. Solid State Chem.* **2013**, *197*, 7–13.
  - Hong, Z. R.; Li, W. L.; Zhao, D. X.; Liang, C. J.; Liu, X. Y.; Peng, J. B.; Zhao, D. Spectrally-Narrow Blue Light-Emitting Organic Electroluminescent Devices Utilizing Thulium Complexes. *Synthetic Metals*, **1999**, *104*, 165–168.
  - Zang, F. X.; Hong, Z. R.; Li, W. L.; Li, M. T.; Sun, X. Y. 1.4  $\mu\text{m}$  Band Electroluminescence from Organic Light-Emitting Diodes Based on Thulium Complexes. *Appl. Phys. Lett.* **2004**, *84*, 2679–2681.

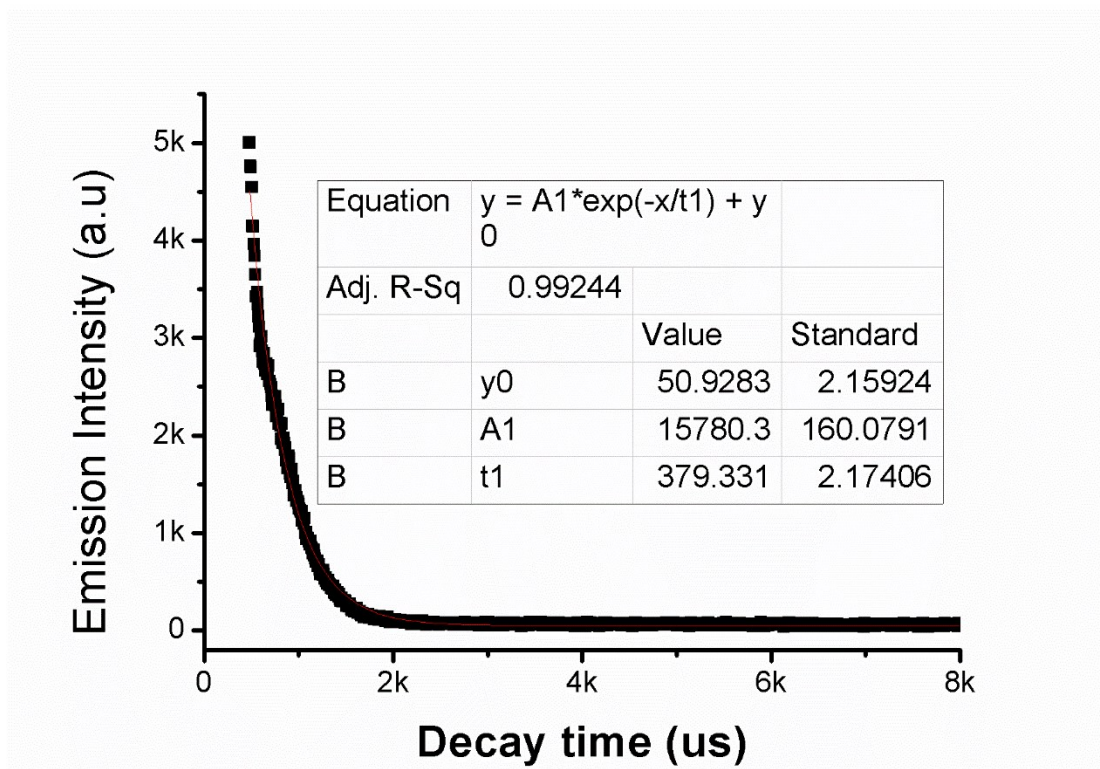

**Figure S4.** The decay curves for the  $^1D_2 \rightarrow ^3F_4$  emissions of  $Tm^{3+}$  in Gd/Tm-MOFs.

**Table S4.** Selected bond lengths [ $\text{\AA}$ ] and angles [ $^\circ$ ] for RE(BTC) $\cdot$ (H<sub>2</sub>O) $\cdot$ DMF.

---

|                     |            |
|---------------------|------------|
| RE(1)-O(3)#1        | 2.317(3)   |
| RE(1)-O(3)#2        | 2.317(3)   |
| RE(1)-O(1)          | 2.323(4)   |
| RE(1)-O(1)#3        | 2.323(4)   |
| RE(1)-O(2)#4        | 2.335(4)   |
| RE(1)-O(2)#5        | 2.335(4)   |
| RE(1)-O(4)          | 2.438(6)   |
| O(2)-RE(1)#6        | 2.335(4)   |
| O(3)-RE(1)#7        | 2.318(3)   |
| O(3)#1-RE(1)-O(3)#2 | 138.74(19) |
| O(3)#1-RE(1)-O(1)   | 146.05(13) |
| O(3)#2-RE(1)-O(1)   | 74.92(13)  |
| O(3)#1-RE(1)-O(1)#3 | 74.92(13)  |
| O(3)#2-RE(1)-O(1)#3 | 146.05(13) |
| O(1)-RE(1)-O(1)#3   | 72.20(18)  |
| O(3)#1-RE(1)-O(2)#4 | 90.07(15)  |
| O(3)#2-RE(1)-O(2)#4 | 84.15(14)  |
| O(1)-RE(1)-O(2)#4   | 89.66(16)  |
| O(1)#3-RE(1)-O(2)#4 | 103.70(15) |
| O(3)#1-RE(1)-O(2)#5 | 84.15(14)  |
| O(3)#2-RE(1)-O(2)#5 | 90.07(15)  |
| O(1)-RE(1)-O(2)#5   | 103.70(15) |
| O(1)#3-RE(1)-O(2)#5 | 89.66(16)  |
| O(2)#4-RE(1)-O(2)#5 | 163.6(2)   |
| O(3)#1-RE(1)-O(4)   | 69.37(10)  |
| O(3)#2-RE(1)-O(4)   | 69.37(10)  |
| O(1)-RE(1)-O(4)     | 143.90(9)  |

|                   |           |
|-------------------|-----------|
| O(1)#3-RE(1)-O(4) | 143.90(9) |
| O(2)#4-RE(1)-O(4) | 81.79(11) |
| O(2)#5-RE(1)-O(4) | 81.79(11) |
| C(5)-O(1)-RE(1)   | 175.0(3)  |
| C(5)-O(2)-RE(1)#6 | 123.4(3)  |
| C(6)-O(3)-RE(1)#7 | 149.2(3)  |
| RE(1)-O(4)-H(4A)  | 109.3     |

Symmetry transformations used to generate equivalent atoms:

#1  $x, y-1, z$     #2  $y, x-1, -z+5/4$     #3  $y+1, x-1, -z+5/4$     #4  $-y+1, x-1, z-1/4$     #5  $x, -y, -z+3/2$   
#6  $y+1, -x+1, z+1/4$     #7  $x, y+1, z$

---

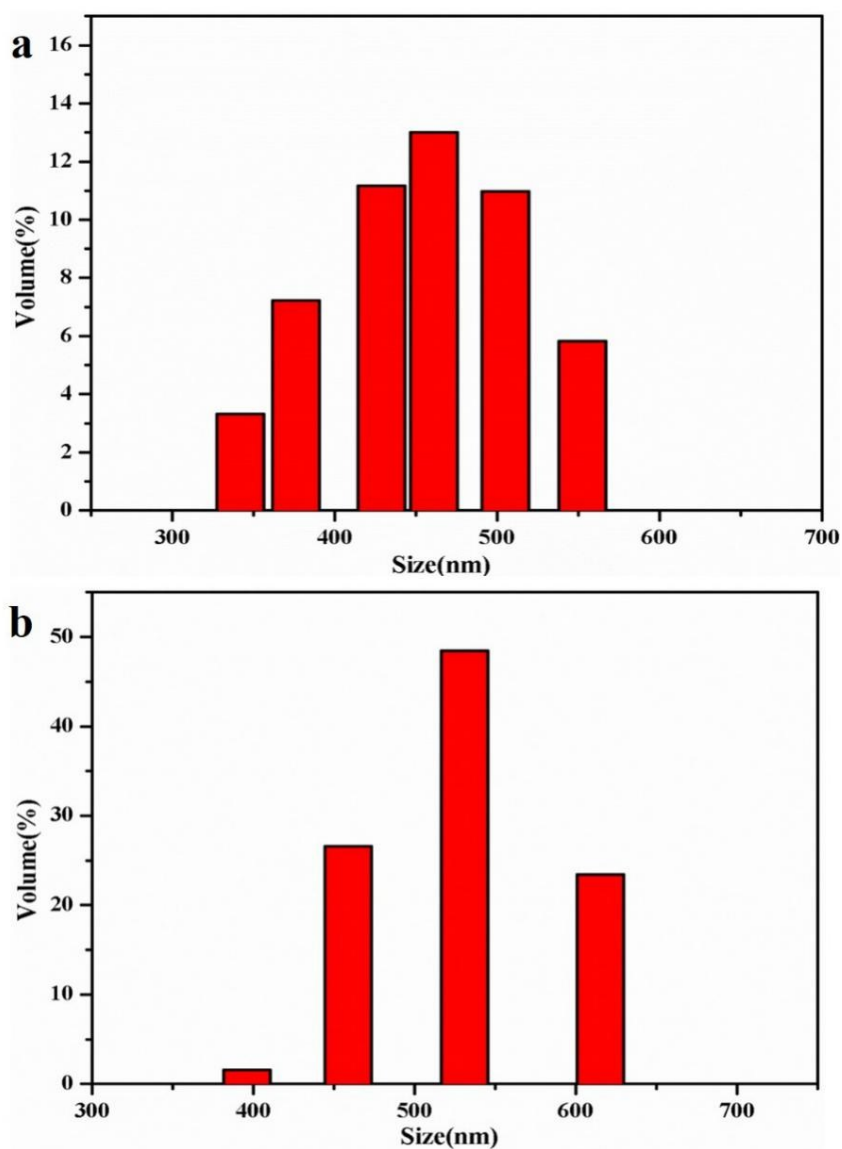

**Figure S5.** The dynamic light scattering (DLS) of Gd/Tm-MOFs, Gd/Tm-MOFs@mSiO<sub>2</sub>, respectively. The DLS suggests that the average width of Gd/Tm-MOFs was 450 nm and the width of Gd/Tm-MOFs@mSiO<sub>2</sub> was around 530 nm approximately. It demonstrates that the thickness of mesoporous SiO<sub>2</sub> shell was about 40 nm.

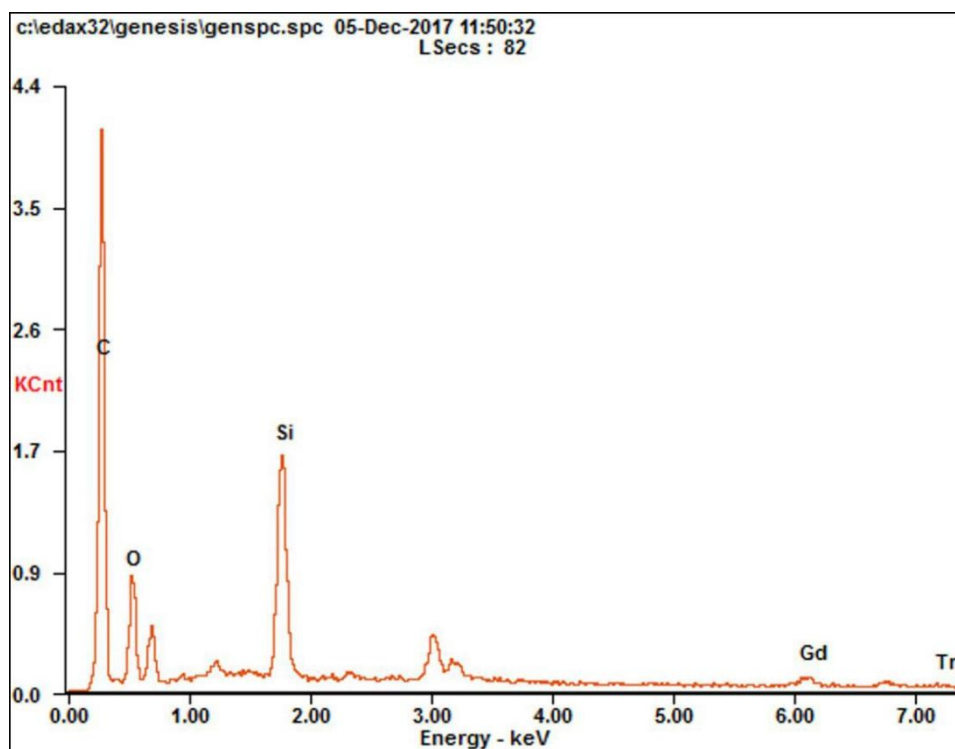

**Figure S6.** The EDS of Gd/Tm-MOFs@mSiO<sub>2</sub>-FA. It determines that the elements of C, O, Si, Gd and Tm are distributed in Gd/Tm-MOFs@mSiO<sub>2</sub>-FA composites.

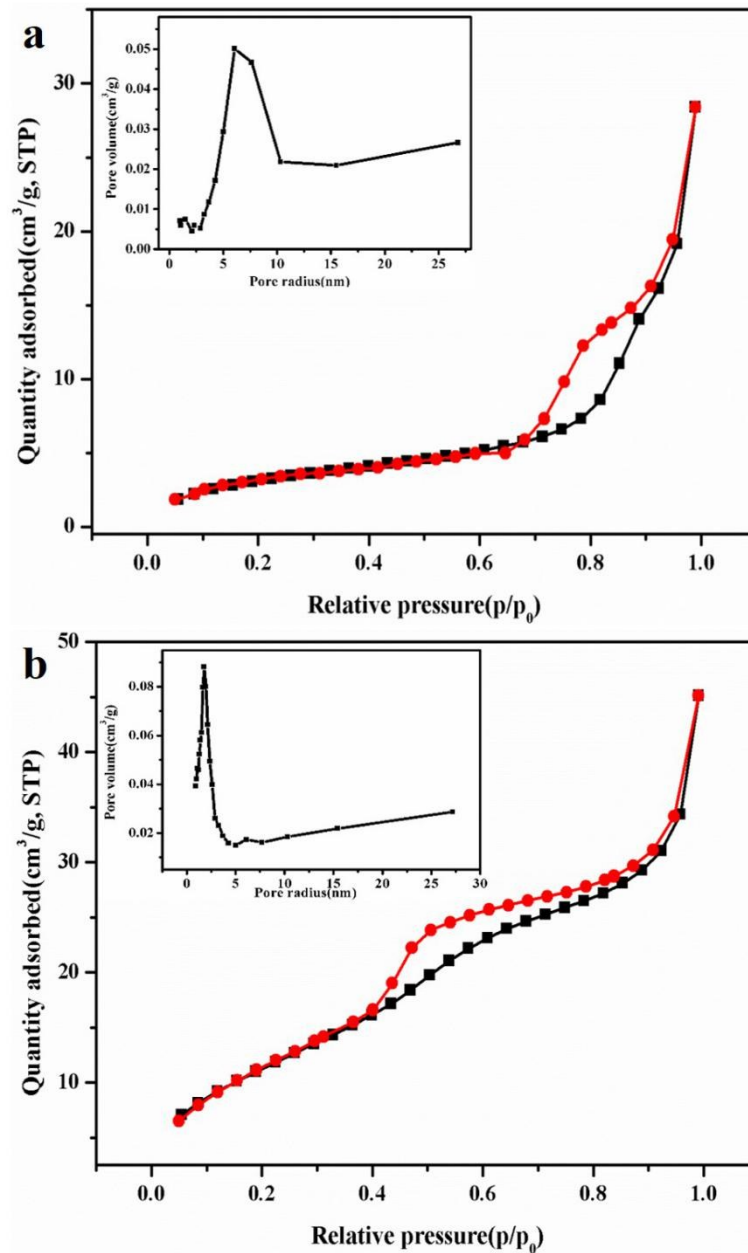

**Figure S7.** N<sub>2</sub> adsorption (black symbols) and desorption (red symbols) isotherm (a, b) of Gd/Tm-MOFs measured at 77 K and the inset was BJH pore-size distributions of Gd/Tm-MOFs, Gd/Tm-MOFs@mSiO<sub>2</sub>, respectively. The surface area of Gd/Tm-MOFs and Gd/Tm-MOFs@mSiO<sub>2</sub>-FA is 22.48 m<sup>2</sup>/g and 43.71 m<sup>2</sup>/g respectively.



**Table S5.** List of composites based on the mesoporous silica for DOX delivery.

| Materials                                                                       | DOX release percent (%)       |                               | The difference (%) | Ref |
|---------------------------------------------------------------------------------|-------------------------------|-------------------------------|--------------------|-----|
|                                                                                 | Simulation pH of normal cells | Simulation pH of cancer cells |                    |     |
| Fe <sub>3</sub> O <sub>4</sub> @GO@mSiO <sub>2</sub>                            | 96                            | 100                           | 4                  | 1   |
| MSN-PEG                                                                         | 37                            | 45                            | 8                  | 2   |
| ICG/MSN@p(NIPAM-co-MA)                                                          | 33                            | 44.9                          | 11.9               | 3   |
| MSN                                                                             | 5                             | 20                            | 15                 | 4   |
| Pd@Ag@sSiO <sub>2</sub> @mSiO <sub>2</sub>                                      | 7.2                           | 26                            | 18.8               | 5   |
| MSN-NH <sub>2</sub>                                                             | 45                            | 69                            | 24                 | 6   |
| MSN@PEM                                                                         | 9                             | 34.25                         | 25.25              | 7   |
| MSN@PDA-PEG                                                                     | 35.5                          | 65.5                          | 30                 | 8   |
| HMSNs                                                                           | 3.5                           | 37.5                          | 34                 | 9   |
| sericin-coated MSNs                                                             | 16.4                          | 53.9                          | 37.5               | 10  |
| MSN@Gelatin                                                                     | 4                             | 44                            | 40                 | 11  |
| GQD-MSNs                                                                        | 7.4                           | 48.6                          | 41.2               | 12  |
| PB@mSiO <sub>2</sub> -PEG                                                       | 3.1                           | 46.6                          | 43.5               | 13  |
| $\alpha$ -CD@PEG-g-chitosan/Fe <sub>3</sub> O <sub>4</sub> @GO@SiO <sub>2</sub> | 45                            | 98                            | 43                 | 14  |
| Ag-MSNs                                                                         | 5                             | 50                            | 45                 | 15  |
| MnFe <sub>2</sub> O <sub>4</sub> @HMSN@YbL(TTA)@DOX@cCTS                        | 33.4                          | 81.4                          | 48                 | 16  |
| HPSN-Salphdc-FA                                                                 | 10                            | 60                            | 50                 | 17  |
| PDEAEMA-HMSNs                                                                   | 12                            | 64                            | 52                 | 18  |
| MSNs-NH-N=C-HA                                                                  | 10.12                         | 65.62                         | 55.5               | 19  |
| MSN-PAA                                                                         | 10                            | 70                            | 60                 | 4   |
| MSN-PMA <sub>SH</sub>                                                           | 25                            | 88                            | 63                 | 20  |
| PAH/PSS-MSNTs                                                                   | 25                            | 90                            | 65                 | 21  |
| PAH-cit/APTES-MSNs                                                              | 20                            | 88                            | 68                 | 22  |

|                                |     |      |      |                  |
|--------------------------------|-----|------|------|------------------|
| MSN@PSA-PEG-FA                 | 5.8 | 78.4 | 72.6 | 23               |
| CPT@MSN-hyd                    | 15  | 90   | 75   | 24               |
| Gd/Tm-MOF@SiO <sub>2</sub> -FA | 12  | 64   | 52   | <b>This work</b> |

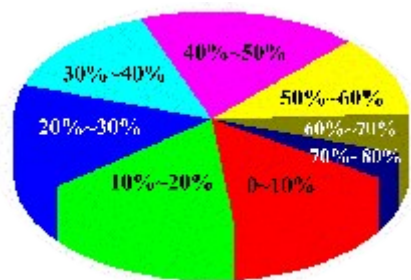

**Figure S8.** Pie chart of distribution DOX release percent.

#### References:

1. Pourjavadi, A.; Tehrani, Z. M.; Jokar, S. Functionalized Mesoporous Silica-Coated Magnetic Graphene Oxide by Polyglycerol-g-Polycaprolactone with pH-Responsive Behavior: Designed for Targeted and Controlled Doxorubicin Delivery. *J. Ind. Eng. Chem.* **2015**, *28*, 45–53.
2. Zhang, Q.; Zhao, H. Y.; Li, D.; Liu, L. P.; Du, S. H. A Surface-Grafted Ligand Functionalization Strategy for Coordinate Binding of Doxorubicin at Surface of PEGylated Mesoporous Silica Nanoparticles: Toward pH-Responsive Drug Delivery. *Colloids Surf., B*, **2016**, *149*, 138–145.
3. Shu, Y.; Song, R. S.; Zheng, A. Q.; Huang, J. L.; Chen, M. L.; Wang, J. H. Thermo/pH Dual-Stimuli-Responsive Drug Delivery for Chemo-/Photothermal Therapy Monitored by Cell Imaging. *Talanta*, **2018**, *181*, 278–285.
4. Yuan, L.; Tang, Q. Q.; Yang, D.; Zhang, J. Z.; Zhang, F. Y.; Hu, J. H. Preparation of pH-Responsive Mesoporous Silica Nanoparticles and Their Application in Controlled Drug Delivery. *J. Phys. Chem. C*, **2011**, *115*(20), 9926–9932.
5. Fang, W. J.; Yang, J.; Gong, J. W.; Zheng, N. F. Photo-and pH-Triggered Release of Anticancer Drugs from Mesoporous Silica-Coated Pd@Ag Nanoparticles. *Adv. Funct. Mater.* **2012**, *22*, 842–848.
6. Wu, X.; Wang, Z. Y.; Zhu, D.; Zong, S. F.; Yang, L. P.; Zhong, Y.; Cui, Y. P. pH and Thermo Dual-Stimuli-Responsive Drug Carrier Based on Mesoporous Silica Nanoparticles Encapsulated in a Copolymer–Lipid Bilayer. *ACS Appl. Mater. Interfaces*, **2013**, *5*(21), 10895–10903.
7. Wang, J.; Liu, H. Y.; Leng, F.; Zheng, L. L.; J. Yang, H.; Wang, W.; Huang, C. Z.

- Autofluorescent and pH-Responsive Mesoporous Silica for Cancer-Targeted and Controlled Drug Release. *Microporous Mesoporous Mater.* **2014**, *186*, 187–193.
8. Li, X. R.; Garamus, V. M.; Li, N.; Gong, Y. B.; Zhe, Z.; Tian, Z. F.; Zou, A. H. Preparation and Characterization of a pH-Responsive Mesoporous Silica Nanoparticle Dual-Modified with Biopolymers. *Colloids Surf., A*, **2018**.
  9. Gao, Y.; Chen, Y.; Ji, X. F.; He, X. Y.; Yin, Q.; Zhang, Z. W.; Shi, J. L.; Li, Y. P. Controlled Intracellular Release of Doxorubicin in Multidrug-Resistant Cancer Cells by Tuning the Shell-Pore Sizes of Mesoporous Silica Nanoparticles. *ACS Nano*, **2011**, *5*, 9788–9798.
  10. Liu, J.; Li, Q. L.; Zhang, J. X.; Huang, L.; Qi, C.; Xu, L. M.; Liu, X. X.; Wang, G. B.; Wang, L.; Wang, Z. Safe and Effective Reversal of Cancer Multidrug Resistance Using Sericin-Coated Mesoporous Silica Nanoparticles for Lysosome-Targeting Delivery in Mice. *Small*, **2017**, *13*, 1602567 1–14.
  11. Zou, Z.; He, D. G.; He, X. X.; Wang, K. M.; Yang, X.; Zhou, Q. Natural Gelatin Capped Mesoporous Silica Nanoparticles for Intracellular Acid-Triggered Drug Delivery. *Langmuir*, **2013**, *29*, 12804–12810.
  12. Yao, X. X.; Tian, Z. F.; Liu, J. X.; Zhu, Y. F.; Hanagata, N. Mesoporous Silica Nanoparticles Capped with Graphene Quantum Dots for Potential Chemo–Photothermal Synergistic Cancer Therapy. *Langmuir*, **2017**, *33*, 591–599.
  13. Su, Y. Y.; Teng, Z. G.; Yao, H.; Wang, S. J.; Tian, Y.; Zhang, Y. L.; Liu, W. F.; Tian, W.; Zheng, L. J.; Lu, N.; Ni, Q. Q.; Su, X. D.; Tang, Y. X.; Sun, J.; Liu, Y.; Wu, J.; Yang, G. F.; Lu, G. M.; Zhang, L. J. A Multifunctional PB@mSiO<sub>2</sub>-PEG/DOX Nanoplatform for Combined Photothermal–Chemotherapy of Tumor. *ACS Appl. Mater. Interfaces* **2016**, *8*, 17038–17046.
  14. Pourjavadi, A.; Tehrani, Z. M.; Jokar, S. Chitosan Based Supramolecular Polypseudorotaxane as a pH-Responsive Polymer and Their Hybridization with Mesoporous Silica-Coated Magnetic Graphene Oxide for Triggered Anticancer Drug Delivery. *Polymer*, **2015**, *76*, 52–61.
  15. Shao, D.; Zhang, X.; Liu, W. L.; Zhang, F.; Zheng, X.; Qiao, P.; Li, J.; Dong, W. F.; Chen, L. Janus Silver-Mesoporous Silica Nanocarriers for SERS Traceable and pH-Sensitive Drug Delivery in Cancer Therapy. *ACS Appl. Mater. Interfaces* **2016**, *8*, 4303–4308.
  16. Shan, C. F.; Wang, B. K.; Hu, B. B.; Liu, W. S.; Tang, Y. Smart Yolk-Shell Type Luminescent Nanocomposites Based on Rare-Earth Complex for NIR–NIR Monitor of Drug Release in Chemotherapy. *J. Photochem. Photobiol., A*, **2018**, *355*, 233–241.
  17. Dai, L. L.; Zhang, Q. F.; Li, J. H.; Shen, X. K.; Mu, C. Y.; Cai, K. Y. Dendrimerlike Mesoporous Silica Nanoparticles as pH-Responsive Nanocontainers for Targeted Drug Delivery and Bioimaging. *ACS Appl. Mater. Interfaces* **2015**, *7*, 7357–7372.
  18. Zhang, Y. Y.; Ang, C. Y.; Li, M. H.; Tan, S. Y.; Qu, Q. Y.; Luo, Z.; Zhao, Y. L. Polymer-Coated Hollow Mesoporous Silica Nanoparticles for Triple-Responsive Drug Delivery. *ACS*

*Appl. Mater. Interfaces* **2015**, *7*, 18179–18187.

19. Chen, C.; Sun, W.; Wang, X. L.; Wang, Y. B.; Wang, P. pH-Responsive Nanoreservoirs Based on Hyaluronic Acid End-Capped Mesoporous Silica Nanoparticles for Targeted Drug Delivery. *Int. J. Biol. Macromol.* **2018**, *111*, 1106–1115.
20. Cui, J. W.; Yan, Y.; Wang, Y. J.; Caruso, F. Templated Assembly of pH-Labile Polymer-Drug Particles for Intracellular Drug Delivery. *Adv. Funct. Mater.* **2012**, *22*, 4718–4723.
21. Yang, Y. J.; Tao, X.; Hou, Q.; Ma, Y.; Chen, X. L.; Chen, J. F. Mesoporous Silica Nanotubes Coated with Multilayered Polyelectrolytes for pH-Controlled Drug Release. *Acta Biomaterialia*, **2010**, *6*, 3092–3100.
22. Zhang, P.; Wu, T.; J. L. Kong, In Situ Monitoring of Intracellular Controlled Drug Release from Mesoporous Silica Nanoparticles Coated with pH-Responsive Charge-Reversal Polymer. *ACS Appl. Mater. Interfaces* **2014**, *6*, 17446–17453.
23. Yang, K.; Luo, H. Q.; Zeng, M.; Jiang, Y. Y.; Li, J. M.; Fu, X. L. Intracellular pH-Triggered, Targeted Drug Delivery to Cancer Cells by Multifunctional Envelope-Type Mesoporous Silica Nanocontainers. *ACS Appl. Mater. Interfaces* **2015**, *7*, 17399–17407.
24. Li, Z. Y.; Liu, Y.; Wang, X. Q.; Liu, L. H.; Hu, J. J.; Luo, G. F.; Chen, W. H.; Rong, L. X.; Zhang, Z. One-Pot Construction of Functional Mesoporous Silica Nanoparticles for the Tumor-Acidity-Activated Synergistic Chemotherapy of Glioblastoma. *ACS Appl. Mater. Interfaces* **2013**, *5*, 7995–8001.

**Table S6.** List of Gd<sup>3+</sup> as excellent T<sub>1</sub>-MRI contrast agents.

| Materials                                                                                                                        | r <sub>1</sub> value (mM <sup>-1</sup> •s <sup>-1</sup> ) | Ref              |
|----------------------------------------------------------------------------------------------------------------------------------|-----------------------------------------------------------|------------------|
| $\beta$ -NaYF <sub>4</sub> :Yb,Gd,Tm                                                                                             | 0.853                                                     | 1                |
| Gd-PEI                                                                                                                           | 2.1                                                       | 2                |
| Gd-DOTA                                                                                                                          | 3                                                         | 3                |
| Gadolinium (Gd)-based bacteria                                                                                                   | 4.1                                                       | 4                |
| NaGdF <sub>4</sub> :Yb/Tm@SiO <sub>2</sub> @TiO <sub>2</sub>                                                                     | 4.53                                                      | 5                |
| Gd•(terephthalic acid)                                                                                                           | 4.55                                                      | 6                |
| Gd-DTPA (widely used in clinic MRI)                                                                                              | 5.77                                                      | 7                |
| gemcitabine-5' -monophosphate/Gd <sup>3+</sup> -PEG                                                                              | 8.3                                                       | 8                |
| Gd•(1,4-BDC)                                                                                                                     | 9.86                                                      | 9                |
| PPy@BSA-Gd                                                                                                                       | 10.203                                                    | 10               |
| Gd-pDBI                                                                                                                          | 12.33                                                     | 11               |
| {[Gd(Cmdcp)-(H <sub>2</sub> O) <sub>3</sub> ](NO <sub>3</sub> )•3H <sub>2</sub> O} <sub>n</sub>                                  | 13.46                                                     | 12               |
| GRGDS-NH <sub>2</sub> +MTX-copolymer-modified Gd MOF nanoparticles                                                               | 14.45                                                     | 9                |
| [DPP-ZnP-GdDOTA] <sup>-</sup>                                                                                                    | 19.94                                                     | 13               |
| Au core-silica layer/Gd <sup>3+</sup> -Au shell                                                                                  | 24                                                        | 3                |
| PNIPAM-co-PNAOS-co-PFMA modified Gd-MOF nanoparticles                                                                            | 33.43                                                     | 9                |
| MTX-copolymer-modified Gd MOF nanoparticles                                                                                      | 38.52                                                     | 9                |
| Gd-AuNCs                                                                                                                         | 41.5±2.5                                                  | 14               |
| Gd <sup>3+</sup> /Dy <sup>3+</sup> /Yb <sup>3+</sup> cosubstitutions in $\beta$ -Ca <sub>3</sub> (PO <sub>4</sub> ) <sub>2</sub> | 48.71                                                     | 15               |
| PEG-Na <sub>x</sub> GdWO <sub>3</sub>                                                                                            | 80                                                        | 16               |
| Gd•(1,2,4-BTC)                                                                                                                   | 83.9                                                      | 17               |
| [Gd <sub>6</sub> (PT1) <sub>4</sub> (NO <sub>3</sub> ) <sub>6</sub> -9H] <sup>3+</sup>                                           | 388.5                                                     | 18               |
| (Gd, Tm) • (BTC)•(H <sub>2</sub> O)•DMF                                                                                          | 225.86                                                    | <b>This work</b> |

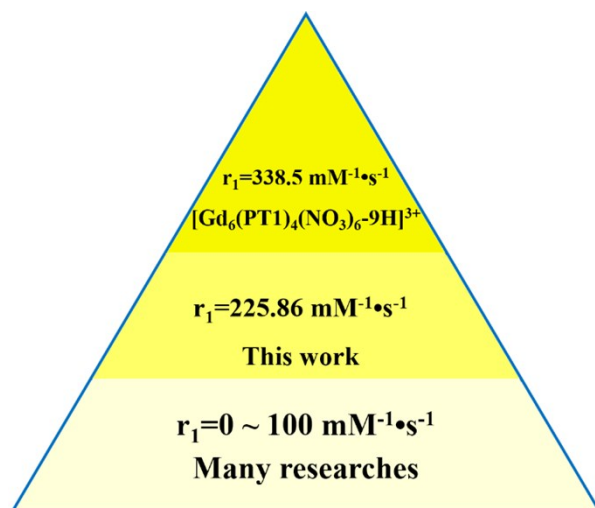

**Figure S9.** Pie chart of reports on  $Gd^{3+}$  as  $T_1$ -MRI contrast agents.

#### References:

- Wang, X.; Chen, J. T.; Zhu, H.; Chen, X.; Yan, X. P. One-step Solvothermal Synthesis of Targetable Optomagnetic Upconversion Nanoparticles for *in Vivo* Bimodal Imaging. *Anal. Chem.* **2013**, *85*, 10225–10232.
- Lim, C. K.; Singh, A.; Heo, J.; Kim, D.; Lee, K. E.; Jeon, H.; Koh, J.; Kwon, I. C.; Kim, S. Gadolinium-Coordinated Elastic Nanogels for *in Vivo* Tumor Targeting and Imaging. *Biomaterials* **2013**, *34*, 6846-6852.
- Marangoni, V. S.; Neumann, O.; Henderson, L.; Kaffes, C. C.; Zhang, H.; Zhang, R. M.; Bishnoi, S.; Zucolotto, V.; Bankson, J. A.; Nordlander, P. Enhancing  $T_1$  Magnetic Resonance Imaging Contrast with Internalized Gadolinium (III) in a Multilayer Nanoparticle. *Proc. Nat. Acad. Sci.* **2017**, *114*, 6960–6965.
- Zhang, L. L.; Liu, Y.; Zhang, Q. Y.; Li, T. G.; Yang, M.; Yao, Q. Q.; Hu, H. Y. Gadolinium-Labelled Aminoglycoside and its Potential Application as a Bacteria-Targeting Magnetic Resonance Imaging Contrast Agent. *Anal. Chem.* **2018**, 1–7.
- Zhang, L. E.; Zeng, L. Y.; Pan Y. W.; Luo, S.; Ren, W. Z.; Gong, A.; Ma, X. H.; Liang, H. Z.; Lu, G. M.; Wu, A. G. Inorganic Photosensitizer Coupled Gd-Based Upconversion Luminescent Nanocomposites for *in Vivo* Magnetic Resonance Imaging and Near-Infrared-Responsive Photodynamic Therapy in Cancers. *Biomaterials* **2015**, *44*, 82–90.
- Tian, C. X.; Zhu, L. P.; Feng, L.; Boyes, S. G. Poly(acrylic acid) Bridged Gadolinium Metal-Organic Framework-Gold Nanoparticle Composites as Contrast Agents for Computed Tomography and Magnetic Resonance Bimodal Imaging. *ACS Appl. Mater. Interfaces* **2015**, *7*, 17765.
- Zhou, J.; Sun, Y.; Du, X. X.; Xiong, L. Q.; Hu, H.; Li, F. Y. Dual-modality *in Vivo* Imaging Using Rare-Earth Nanocrystals with Near-Infrared to Near-Infrared (NIR-to-NIR) Upconversion Luminescence and Magnetic Resonance Properties. *Biomaterials* **2010**, *31*,

3287–3295.

9. Li, L. L.; Tong, R.; Li, M. Y.; Kohane, D. S. Self-Assembled Gemcitabine-Gadolinium Nanoparticles for Magnetic Resonance Imaging and Cancer Therapy. *Acta Biomater.* **2016**, *33*, 34–39.
10. Rowe, M. D.; Thamm, D. H.; Kraft, S. L.; Boyes, S. G. Polymer-Modified Gadolinium Metal-Organic Framework Nanoparticles Used as Multifunctional Nanomedicines for the Targeted Imaging and Treatment of Cancer. *Biomacromolecules* **2009**, *10*, 983-993.
11. Yang, Z.; He, W. S.; Zheng, H. Y.; Wei, J. L.; Liu, P.; Zhu, W.; Li, L. P.; Zhang, L.; Yi, C. F.; Xu, Z. S.; Ren, J. H. One-Pot Synthesis of Albumin-Gadolinium Stabilized Polypyrrole Nanotheranostic Agent for Magnetic Resonance Imaging Guided Photothermal Therapy. *Biomaterials* **2018**.
12. Meenambal, R.; Kannan, S. Cosubstitution of Lanthanides ( $Gd^{3+}/Dy^{3+}/Yb^{3+}$ ) in  $\beta-Ca_3(PO_4)_2$  for Upconversion Luminescence, CT/MRI Multimodal Imaging. *ACS Biomater. Sci. Eng.* **2017**, *4*, 47–56.
13. Kundu, T.; Mitra, S.; Díaz Díaz, D.; Banerjee, R. Gadolinium(III)-Based Porous Luminescent Metal–Organic Frameworks for Bimodal Imaging. *ChemPlusChem*, **2016**, *81*, 728-732.
14. Qin, L.; Sun, Z. Y.; Cheng, K.; Liu, S. W.; Pang, J. X.; Xia, L. M.; Chen, W. H.; Cheng, Z.; Chen, J. X. Zwitterionic Manganese and Gadolinium Metal-Organic Frameworks as Efficient Contrast Agents for in Vivo Magnetic Resonance Imaging. *Acs Appl Mater Interfaces*, **2017**, *9*, 1-9.
15. Schmitt J.; Heitz V.; Sour A.; Bolze, F.; Kessler, P.; Flamigni, L.; Ventura, B.; Bonnet, C. S.; Tóth, É. A Theranostic Agent Combining a Two-Photon-Absorbing Photosensitizer for Photodynamic Therapy and a Gadolinium(III) Complex for MRI Detection. *Chem. Eur. J.* **2016**, *22*, 2775–2786.
16. Liang, G. H.; Ye, D. X.; Zhang, X. X.; Dong, F.; Chen, H.; Zhang, S.; Li, J. Q.; Shen, X. R.; Kong, J. L. One-Pot Synthesis of  $Gd^{3+}$ -Functionalized Gold Nanoclusters for Dual Model (Fluorescence/Magnetic Resonance) Imaging. *J. Mater. Chem. B* **2013**, *1*, 3545–3552.
17. Ni, D. L.; Zhang, J. W.; Wang, J.; Hu, P.; Jin, Y.; Tang, Z. M.; Yao, Z. W.; Bu, W. B.; Shi, J. L. Oxygen Vacancy Enables Markedly Enhanced Magnetic Resonance Imaging-Guided Photothermal Therapy of a  $Gd^{3+}$ -Doped Contrast Agent. *ACS Nano* **2017**, *11*, 4256-4264.
18. Hatakeyama, W.; Sanchez, T. J.; Rowe, M. D.; Serkova, N. J.; Liberatore, M. W.; Boyes, S. G. Synthesis of Gadolinium Nanoscale Metal-Organic Framework with Hydrotropes: Manipulation of Particle Size and Magnetic Resonance Imaging Capability. *Acs Appl. Mater. Interfaces* **2011**, *3*, 1502-1510.
19. He, C.; Wu, X.; Kong, J. C.; Liu, T.; Zhang, X. L.; Duan, C. Y. A Hexanuclear Gadolinium-Organic Octahedron as a Sensitive MRI Contrast Agent for Selectively Imaging Glucosamine in Aqueous Media. *Chem. Commun.* **2012**, *48*, 9290-9292.
